# Supplementary material
Source: publisher figshare collection journal article supplement (https://gsajournals.figshare.com/ndownloader/files/12447635)
Supplement: Supplementary file 1 [file 12447635]

| Sample | Status |
| --- | --- |
| ATCACG | Unaffected |
| CGATGT | Affected |
| TTAGGC | Affected |
| TGACCA | Affected |
| ACAGTG | Affected |
| GCCAAT | Affected |
| CAGATC | Unaffected |
| ACTTGA | Affected |
| GATCAG | Unaffected |
| TAGCTT | Unaffected |
